# Supplementary material for: Antimicrobial Activity of Lactococcus lactis subsp. lactis Isolated from a Stranded Cuvier’s Beaked Whale (Ziphius cavirostris) against Gram-Positive and -Negative Bacteria
Source: PubMed Central journal article supplement (PMC7911499; doi:10.3390/microorganisms9020243), 2021-01-25
Supplement: microorganisms-09-00243-s001.pdf [file microorganisms-09-00243-s001.pdf]

**Table S1.** Bacterial strains and the culture temperature and conditions used for the agar well diffusion assay.

| Indicator bacteria species                          | Strain     | Culture temperature | Culture condition |
|-----------------------------------------------------|------------|---------------------|-------------------|
| <i>Vibrio alginolyticus</i>                         | ATCC 17749 | 25°C                | aerobic           |
| <i>Vibrio parahaemolyticus</i>                      | ATCC 17802 | 25°C                | aerobic           |
| <i>Escherichia coli</i>                             | DSM 30083  | 25°C                | aerobic           |
| <i>Photobacterium damsela</i> subsp. <i>damsela</i> | DSM 7482   | 25°C                | aerobic           |
| <i>Lactococcus lactis</i> subsp. <i>lactis</i>      | ATCC 19435 | 25°C                | anaerobic         |
| <i>Lactococcus lactis</i> subsp. <i>cremoris</i>    | ATCC 19257 | 30°C                | anaerobic         |
| <i>Lactococcus garvieae</i>                         | ATCC 43921 | 25°C                | anaerobic         |
| <i>Lactococcus plantarum</i>                        | ATCC 43199 | 30°C                | anaerobic         |
| <i>Lactococcus raffinolactis</i>                    | ATCC 43920 | 30°C                | anaerobic         |
| <i>Enterococcus faecalis</i>                        | DSM 20478  | 30°C                | anaerobic         |
| <i>Enterococcus hirae</i>                           | ATCC8043   | 30°C                | anaerobic         |
| <i>Enterococcus faecium</i>                         | ATCC 19434 | 30°C                | anaerobic         |
| <i>Enterococcus canis</i>                           | DSM 17029  | 37°C                | anaerobic         |
| <i>Staphylococcus xylosum</i>                       | ATCC 29971 | 37°C                | anaerobic         |
| <i>Staphylococcus epidermidis</i>                   | ATCC 14990 | 37°C                | anaerobic         |
| <i>Bacillus subtilis</i> subsp. <i>subtilis</i>     | ATCC 6051  | 37°C                | aerobic           |
| <i>Streptococcus salivarius</i>                     | DSM 20560  | 37°C                | anaerobic         |



|                              |   |   |   |   |   |   |     |   |
|------------------------------|---|---|---|---|---|---|-----|---|
| Rhamnose                     | - | - | - | - | - | - | 8%  | - |
| Ribose                       | + | + | + | + | + | + | +   | + |
| Saccharose                   | + | + | + | + | + | + | 92% | + |
| Salicin                      | + | + | + | + | + | + | +   | + |
| Sorbitol                     | - | - | - | - | - | - | -   | - |
| Starch                       | + | + | + | W | W | + | 58% | + |
| Trehalose                    | + | + | + | + | + | + | +   | - |
| Xylitol                      | - | - | - | - | - | - | -   | - |
| $\alpha$ -Methyl-D-glucoside | - | - | - | - | - | - | -   | - |
| $\alpha$ -Methyl-D-mannoside | - | - | - | - | - | - | -   | - |
| $\beta$ -Gentiobiose         | + | + | + | + | + | + | +   | + |
| $\beta$ -Methyl-xyloside     | - | - | - | - | - | - | -   | - |

+, positive reaction, W; weakly positive reaction, and -, negative reaction

<sup>a</sup> The data for coastal fish-derived *Lactococcus lactis* subsp. *lactis* was cited from the result of Itoi *et al.* [22]

<sup>b</sup> The data for clam (*Meretrix lamarckii*)-derived *Lactococcus lactis* subsp. *lactis* was cited from the result of Itoi *et al.* [53]

<sup>c</sup> The percentage values represent the positive incidence

<sup>d</sup> The data for freshwater fish-derived *Lactococcus lactis* subsp. *lactis* was isolated from Amur catfish (*Silurus asotus*) [21], and the data is shown in Itoi *et al.* [58]

(a)

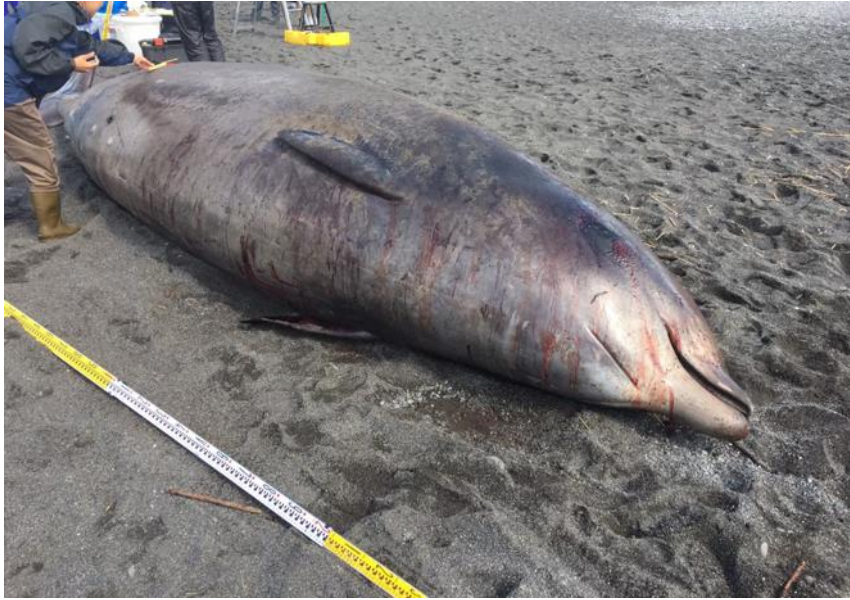

(b)

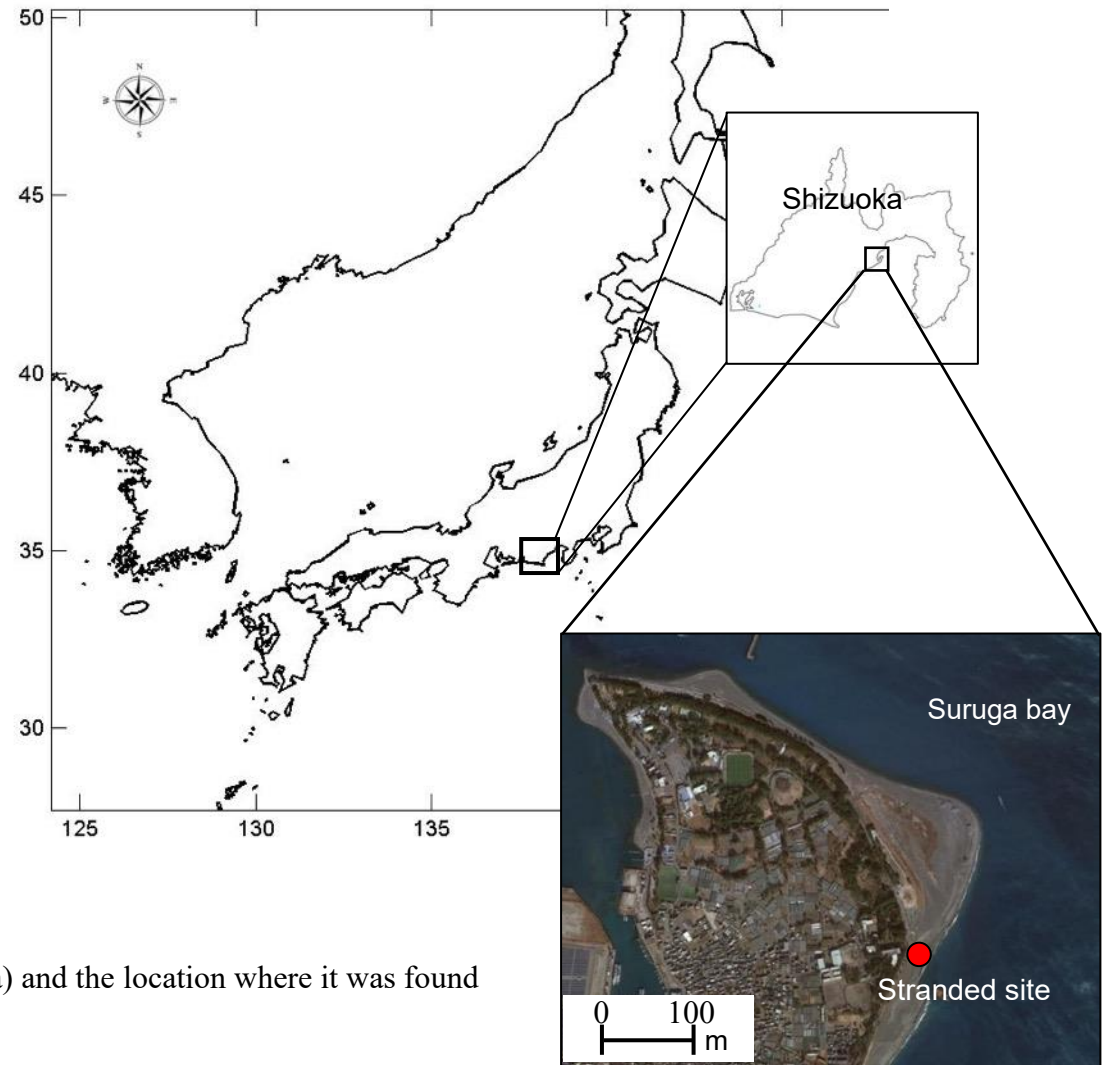

**Figure S1.** The sampled stranded female Cuvier's beaked whale (a) and the location where it was found in Shimizu, Shizuoka, Japan (b).

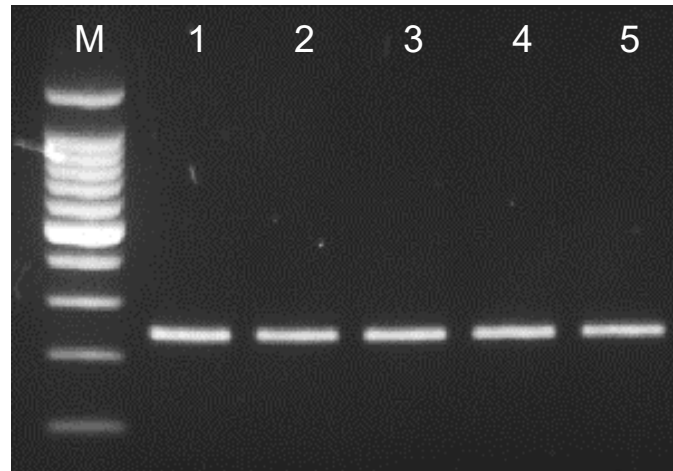

**Figure S2.** PCR amplification using a universal primer (8F, [28]) and a *Lactococcus lactis*-specific primer (LacreR, [29]). Lane M: 100 bp ladder marker from 100 to 1,000 bp and 1,500 bp; lanes 1–5: strains CBW1–5.

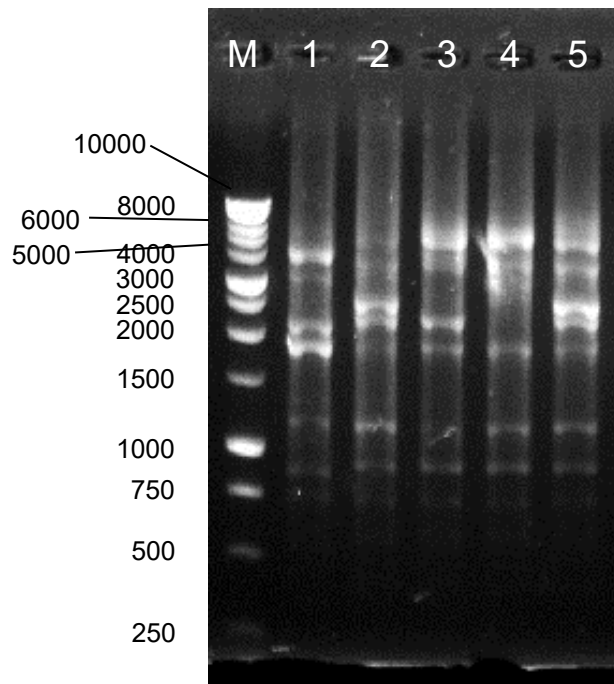

**Figure S3.** RAPD-PCR bands patterns of five *Lactococcus lactis* subsp. *lactis* strains in this study. Lane M: molecular weight ladder marker; lanes 1-5: strains CBW1-5.

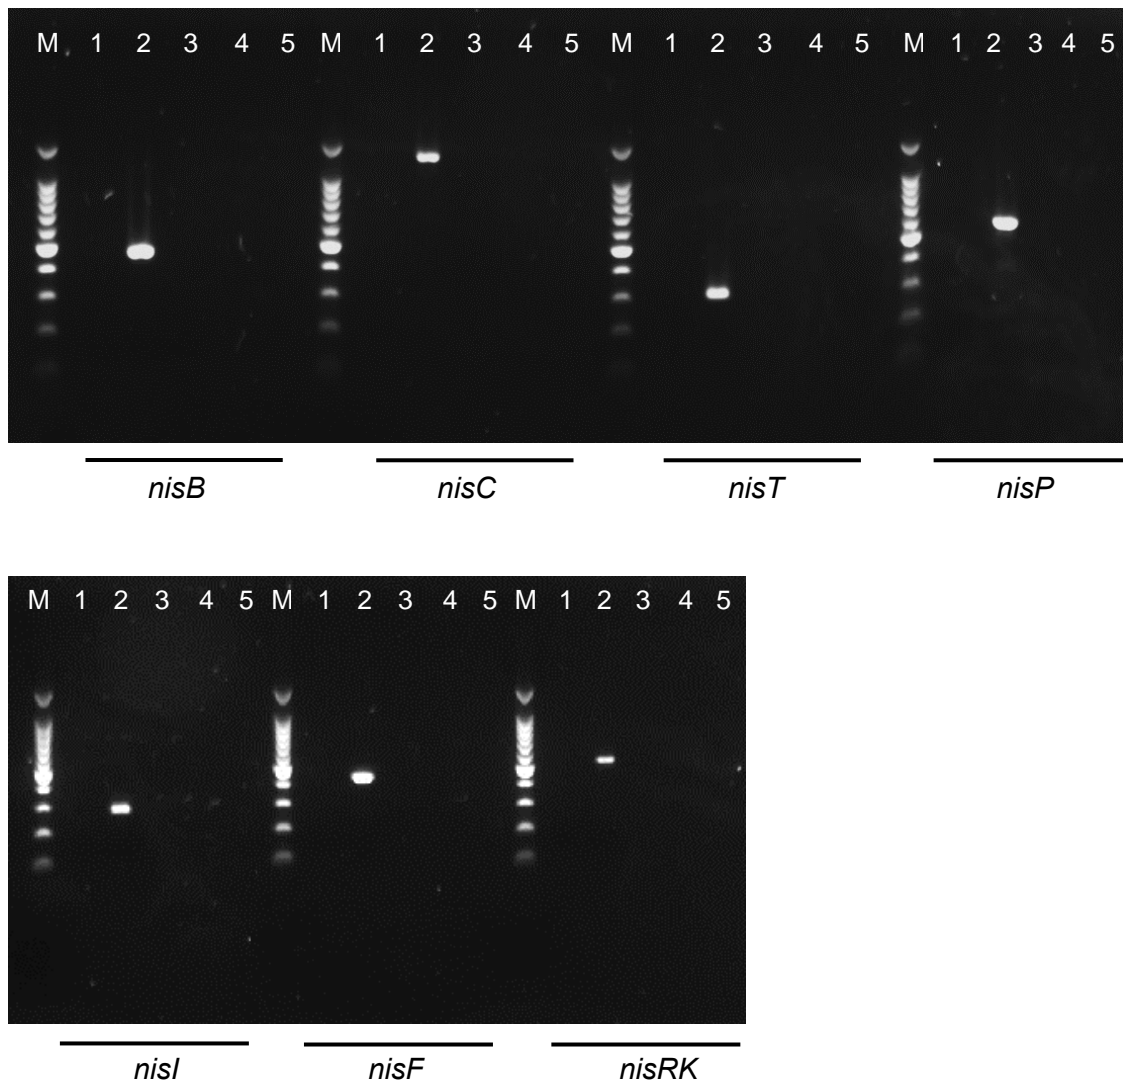

**Figure S4.** PCR results for nisin biosynthesis-related genes in five *Lactococcus lactis* subsp. *lactis* strains isolated from the fecal sample of a stranded female Cuvier's beaked whale. Lane M: 100-bp ladder marker from 100 to 1,000 bp and 1,500 bp; lanes 1-5: strains CBW1-5.
